# Supplementary material for: A Cost-Effectiveness Tool for Informing Policies on Zika Virus Control
Source: PubMed Central journal article supplement (PMC4874682; doi:10.1371/journal.pntd.0004743), 2016-05-20

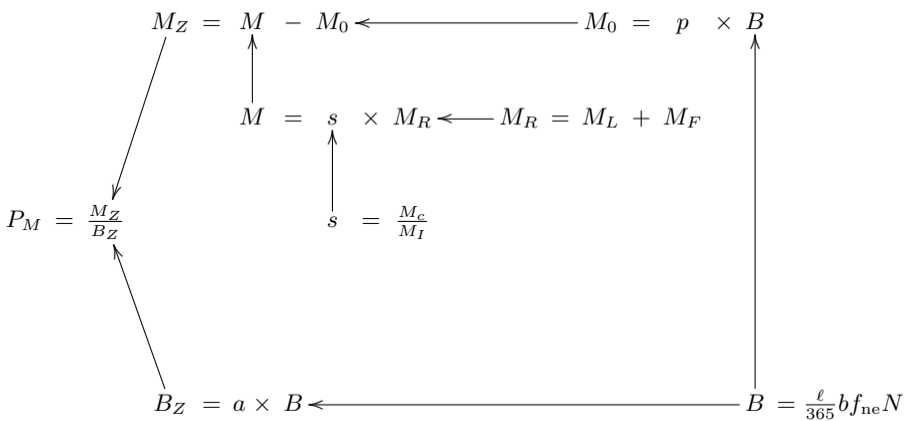

Supplement: pntd.0004743.s002.pdf [file pntd.0004743.s002.pdf]
